# Supplementary material for: Prescription of anxiolytics, sedatives, hypnotics and antidepressants in outpatient, universal care during the COVID-19 pandemic in Portugal: a nationwide, interrupted time-series approach
Source: HighWire-hosted journal article supplement (doi:10.1136/jech-2021-216732), 2021-10-08
Supplement: jech-2021-216732supp001_data_supplement.pdf [file jech-2021-216732supp001_data_supplement.pdf]

## SUPPLEMENTARY MATERIAL

Table S1 - Regression analysis results

|                    | Jan 18 - Dec 20   | Immediate impact   |                    |                   | Change in trend     |                    |                   |
|--------------------|-------------------|--------------------|--------------------|-------------------|---------------------|--------------------|-------------------|
|                    | B                 | B                  | LB                 | UB                | B                   | LB                 | UB                |
| <b>No5BC_M_C</b>   | 5.24              | -4113.96*          | -6548.27           | -1679.66          | 28.73               | -286.56            | 344.02            |
| <b>No5BC_M_Ad</b>  | 114.12            | -6893.66*          | -11682.36          | -2104.96          | 658.41              | -51.63             | 1368.45           |
| <b>No5BC_M_A</b>   | -4259.88          | -178847.97         | -628888.80         | 271192.86         | 25753.22            | -39346.29          | 90852.72          |
| <b>No5BC_M_OA</b>  | 511.02            | -114593.57         | -347695.34         | 118508.21         | 21431.53            | -12829.77          | 55692.82          |
| <b>No5BC_M_E</b>   | 2394.78           | -126913.12         | -339217.49         | 85391.25          | 23673.82            | -7583.51           | 54931.14          |
| <b>No5BC_F_C</b>   | 10.54             | -3867.08*          | -5836.94           | -1897.23          | 106.60              | -144.61            | 357.80            |
| <b>No5BC_F_Ad</b>  | 208.16            | -13556.27*         | -20775.41          | -6337.14          | 1033.20             | -11.06             | 2077.47           |
| <b>No5BC_F_A</b>   | -18924.83         | -525542.53         | -1625306.68        | 574221.62         | 88464.09            | -70619.47          | 247547.65         |
| <b>No5BC_F_OA</b>  | -2302.43          | -454917.77         | -1051464.65        | 141629.12         | 75228.87            | -12417.46          | 162875.21         |
| <b>No5BC_F_E</b>   | 3995.86           | -547345.25         | -1176299.91        | 81609.42          | 87693.08            | -4616.64           | 180002.79         |
| <b>No5BC_Total</b> | <b>-12748.59</b>  | <b>-2358298.58</b> | <b>-5512331.21</b> | <b>795734.05</b>  | <b>352660.79</b>    | <b>-107415.37</b>  | <b>812736.96</b>  |
| <b>No6A_M_C</b>    | 0.15              | -126.56            | -478.02            | 224.90            | -12.05              | -68.39             | 44.29             |
| <b>No6A_M_Ad</b>   | 314.64            | -2256.31           | -18474.14          | 13961.52          | -1982.33            | -4586.17           | 621.52            |
| <b>No6A_M_A</b>    | 63941.77*         | 377783.81          | -183565.13         | 939132.74         | -217493.22*         | -324244.75         | -110741.68        |
| <b>No6A_M_OA</b>   | 28761.82*         | 128570.57          | -162444.62         | 419585.78         | -61169.92*          | -110190.83         | -12149.00         |
| <b>No6A_M_E</b>    | 37632.48*         | 155500.32          | -142610.17         | 453610.81         | -73417.17*          | -123698.05         | -23136.28         |
| <b>No6A_F_C</b>    | -9.07             | -329.49            | -890.71            | 231.73            | 13.66               | -76.45             | 103.76            |
| <b>No6A_F_Ad</b>   | 1210.27*          | -15542.02          | -43262.46          | 12178.41          | -1964.85            | -6415.50           | 2485.79           |
| <b>No6A_F_A</b>    | 133247.29*        | 698026.24          | -1472805.80        | 2868858.29        | -526663.88*         | -910166.53         | -143161.23        |
| <b>No6A_F_OA</b>   | 71412.42*         | 99445.16           | -894328.40         | 1093218.72        | -135647.21          | -300714.07         | 29419.66          |
| <b>No6A_F_E</b>    | 112178.00*        | 80444.24           | -868939.80         | 1029828.28        | -165084.64*         | -324497.43         | -5671.84          |
| <b>No6A_Total</b>  | <b>455296.88*</b> | <b>1563037.11</b>  | <b>-3618114.40</b> | <b>6744188.61</b> | <b>-1210469.20*</b> | <b>-2109586.14</b> | <b>-311352.27</b> |

No5BC - Anxiolytics, sedatives, and hypnotics; No6A - antidepressants; M - male; F - female; C - children ( $\leq 7$ ); Ad - adolescents (8-17); A - adults (18-64); OA - older adults (65-74); E - elderly ( $\geq 75$ ); LB - lower bound; UB - upper bound ; \* $p < 0.005$
