# Supplementary material for: Prescription of anxiolytics, sedatives, hypnotics and antidepressants in outpatient, universal care during the COVID-19 pandemic in Portugal: a nationwide, interrupted time-series approach
Source: HighWire-hosted journal article supplement (doi:10.1136/jech-2021-216732), 2021-10-08
Supplement: jech-2021-216732supp002_data_supplement.pdf [file jech-2021-216732supp002_data_supplement.pdf]

| NosBC                   |                  | Male           |                            | NosBC                   |                  | Female                 |                            |
|-------------------------|------------------|----------------|----------------------------|-------------------------|------------------|------------------------|----------------------------|
|                         |                  | B              | 95% CI                     |                         |                  | B                      | 95% CI                     |
| Children (≥7yo)         | Intercept        | 8145.09        | [4588.053; 11702.126]      | Children (≥7yo)         | Intercept        | 5928.084               | [3878.426; 7977.742]       |
|                         | Month            | -6.537         | [-62.244; 49.17]           |                         | Month            | 10.433                 | [-23.747; 44.614]          |
|                         | Immediate impact | -3795.813      | [-5361.473; -2230.152]     |                         | Immediate impact | -2938.741              | [-3966.1; -1911.382]       |
|                         | Change in trend  | -0.355         | [-179.703; 178.993]        |                         | Change in trend  | -26.052                | [-133.6; 81.495]           |
|                         | Lag 1            | 0.48           | [0.227; 0.734]             |                         | Lag 1            | 0.558                  | [0.346; 0.769]             |
| Lag 3                   | -0.21            | [-0.449; 0.03] | Lag 3                      | -0.242                  | [-0.419; -0.064] |                        |                            |
| Adolescents (8-17 yo)   | Intercept        | 25032.093      | [23434.126; 26630.059]     | Adolescents (8-17 yo)   | Intercept        | 22149.058              | [12445.404; 31852.712]     |
|                         | Month            | 47.741         | [-55.731; 151.214]         |                         | Month            | 75.601                 | [-115.396; 266.599]        |
|                         | Immediate impact | -2899.086      | [-5673.124; -125.047]      |                         | Immediate impact | -7142.784              | [-12399.813; -1885.754]    |
|                         | Change in trend  | 122.734        | [-188.297; 433.766]        |                         | Change in trend  | 521.04                 | [-5.987; 1048.068]         |
| Adults (18-64 yo)       | Intercept        | 253116.882     | [1405768.077; 3656465.686] | Adults (18-64 yo)       | Intercept        | 5082644.5              | [1916071.512; 8249217.488] |
|                         | Month            | -2827.973      | [-13807.306; 8151.361]     |                         | Month            | -21331.203             | [-47277.024; 4614.618]     |
|                         | Immediate impact | -168291.273    | [-439366.75; 102784.205]   |                         | Immediate impact | -80580.271             | [-676807.978; 515647.435]  |
|                         | Change in trend  | 27129.403      | [-3468.677; 57727.482]     |                         | Change in trend  | 45887.324              | [-23833.166; 115607.814]   |
|                         | Lag 2            | 0.229          | [-0.111; 0.57]             |                         | Lag 1            | 0.253                  | [-0.072; 0.579]            |
| Older adults (65-74 yo) | Intercept        | 1379612.883    | [864925.345; 1894300.421]  | Older adults (65-74 yo) | Intercept        | 0.27                   | [-0.091; 0.632]            |
|                         | Month            | -1251.19       | [-3925.95; 1423.57]        |                         | Lag 2            | 0.07                   | [-0.286; 0.425]            |
|                         | Immediate impact | -34403.698     | [-100896.531; 32089.136]   |                         | Intercept        | 3376396.867            | [2145934.266; 4606859.467] |
|                         | Change in trend  | 13162.105      | [4929.026; 21395.183]      |                         | Month            | -4992.874              | [-12307.695; 2321.947]     |
|                         | Lag 2            | 0.057          | [-0.296; 0.41]             |                         | Immediate impact | -186383.981            | [-374446.635; 1678.673]    |
| Elderly (≥75 yo)        | Intercept        | 1318644.519    | [850513.793; 1786775.246]  | Elderly (≥75 yo)        | Change in trend  | 40328.925              | [17743.871; 62913.979]     |
|                         | Month            | -483.559       | [-3183.179; 2216.061]      |                         | Lag 2            | 0.07                   | [-0.27; 0.41]              |
|                         | Immediate impact | -30939.044     | [-94317.285; 32439.197]    |                         | Intercept        | 3767956.87             | [2602799.986; 4933113.754] |
|                         | Change in trend  | 14582.464      | [6863.673; 22301.255]      |                         | Month            | 1921.592               | [-5666.12; 9509.304]       |
|                         | Lag 3            | 0.037          | [-0.309; 0.384]            |                         | Immediate impact | -330938.278            | [-516988.894; -144887.661] |
|                         |                  |                |                            | Change in trend         | 55986.339        | [34033.335; 77939.342] |                            |
|                         |                  |                |                            | Lag 3                   | 0.02             | [-0.282; 0.322]        |                            |
