# Supplementary material for: Prescription of anxiolytics, sedatives, hypnotics and antidepressants in outpatient, universal care during the COVID-19 pandemic in Portugal: a nationwide, interrupted time-series approach
Source: HighWire-hosted journal article supplement (doi:10.1136/jech-2021-216732), 2021-10-08
Supplement: jech-2021-216732supp003_data_supplement.pdf [file jech-2021-216732supp003_data_supplement.pdf]

| No6A                    |                  | Male        |                            |
|-------------------------|------------------|-------------|----------------------------|
|                         |                  | B           | 95% CI                     |
| Children (≥7yo)         | Intercept        | 560.425     | [207.703; 913.147]         |
|                         | Month            | 2.269       | [-10.577; 15.115]          |
|                         | Immediate impact | -131.65     | [-439.622; 176.322]        |
|                         | Change in trend  | -12.169     | [-47.232; 22.895]          |
|                         | Lag 2            | 0.191       | [-0.142; 0.525]            |
| Adolescents (8-17 yo)   | Intercept        | 122562.778  | [61599.554; 183526.003]    |
|                         | Month            | 789.97      | [217.079; 1362.861]        |
|                         | Immediate impact | -9808.517   | [-18070.964; -1546.07]     |
|                         | Change in trend  | -2313.236   | [-3982.568; -643.904]      |
|                         | Lag 1            | -0.333      | [-0.74; 0.075]             |
|                         | Lag 2            | -0.315      | [-0.738; 0.109]            |
|                         | Lag 3            | -0.179      | [-0.593; 0.236]            |
| Adults (18-64 yo)       | Intercept        | 3470427.341 | [1971282.007; 4969572.676] |
|                         | Month            | 23350.244   | [7910.992; 38789.496]      |
|                         | Immediate impact | -99413.193  | [-325900.116; 127073.73]   |
|                         | Change in trend  | -37988.111  | [-73488.166; -2488.056]    |
|                         | Lag 3            | 0.129       | [-0.259; 0.518]            |
| Older adults (65-74 yo) | Intercept        | 1722150.31  | [805759.327; 2638541.293]  |
|                         | Month            | 14871.872   | [5937.537; 23806.206]      |
|                         | Immediate impact | -21996.522  | [-112863.079; 68870.035]   |
|                         | Change in trend  | -18402.103  | [-33121.974; -3682.232]    |
|                         | Lag 1            | -0.253      | [-0.613; 0.108]            |
|                         | Lag 3            | 0.222       | [-0.142; 0.586]            |
| Elderly (≥75 yo)        | Intercept        | 1764842.477 | [119015.648; 2410669.307]  |
|                         | Month            | 17069.495   | [8473.766; 25665.225]      |
|                         | Immediate impact | -17503.887  | [-122518.893; 87511.118]   |
|                         | Change in trend  | -17232.587  | [-31880.874; -2584.299]    |
|                         | Lag 3            | -0.019      | [-0.407; 0.368]            |

| No6A                    |                  | Female      |                             |
|-------------------------|------------------|-------------|-----------------------------|
|                         |                  | B           | 95% CI                      |
| Children (≥7yo)         | Intercept        | 1.409       | [1.052; 1.765]              |
|                         | Month            | 0.004       | [-0.01; 0.018]              |
|                         | Immediate impact | -0.14       | [-0.478; 0.197]             |
|                         | Change in trend  | 0.008       | [-0.029; 0.046]             |
|                         | Lag 2            | -0.472      | [-0.78; -0.163]             |
| Adolescents (8-17 yo)   | Intercept        | 94146.146   | [59316.623; 128975.67]      |
|                         | Month            | 1198.35     | [459.362; 1937.337]         |
|                         | Immediate impact | -20817.58   | [-33061.469; -8573.69]      |
|                         | Change in trend  | -404.131    | [-1967.057; 1158.794]       |
|                         | Lag 3            | 0.079       | [-0.273; 0.431]             |
| Adults (18-64 yo)       | Intercept        | 13220607.15 | [7683641.697; 18757572.601] |
|                         | Month            | 53747.301   | [9236.958; 98257.643]       |
|                         | Immediate impact | -383600.692 | [-1156313.525; 389112.141]  |
|                         | Change in trend  | -91526.603  | [-201911.877; 18858.672]    |
|                         | Lag 3            | 0.073       | [-0.325; 0.47]              |
| Older adults (65-74 yo) | Intercept        | 5196186.216 | [2926812.272; 7465560.161]  |
|                         | Month            | 34330.919   | [14964.471; 53697.366]      |
|                         | Immediate impact | -218185.258 | [-460427.564; 24057.048]    |
|                         | Change in trend  | -24970.701  | [-61175.544; 11234.143]     |
|                         | Lag 3            | 0.068       | [-0.347; 0.483]             |
| Elderly (≥75 yo)        | Intercept        | 4683678.502 | [2677883.482; 6689473.523]  |
|                         | Month            | 47646.065   | [23363.5; 71928.63]         |
|                         | Immediate impact | -293440.339 | [-546313.167; -40567.51]    |
|                         | Change in trend  | -22566.809  | [-59314.213; 14180.596]     |
|                         | Lag 3            | 0.121       | [-0.267; 0.509]             |
