# Supplementary material for: Prescription of anxiolytics, sedatives, hypnotics and antidepressants in outpatient, universal care during the COVID-19 pandemic in Portugal: a nationwide, interrupted time-series approach
Source: HighWire-hosted journal article supplement (doi:10.1136/jech-2021-216732), 2021-10-08
Supplement: jech-2021-216732supp004_data_supplement.pdf [file jech-2021-216732supp004_data_supplement.pdf]

Table S4 - Anxiolytics, sedatives, and hypnotics prescription - sensitivity analysis

| NOSBC prescription - Pandemic interruption a month before |                         | Immediate impact |                            | Change in trend |                          |
|-----------------------------------------------------------|-------------------------|------------------|----------------------------|-----------------|--------------------------|
|                                                           |                         | B                | 95% CI                     | B               | 95% CI                   |
| Male                                                      | Children ( $\geq 7$ yo) | -2457.475*       | [-4070.957; -843.994]      | -57.872         | [-268.224; 152.48]       |
|                                                           | Adolescents (8-17 yo)   | -2629.592        | [-5357.292; 98.109]        | 58.073          | [-228.035; 344.181]      |
|                                                           | Adults (18-64 yo)       | -175867.892      | [-438248.359; 86512.574]   | 23179.303       | [-4660.224; 51018.831]   |
|                                                           | Older adults (65-74 yo) | -40443.023       | [-104827.254; 23941.207]   | 12100.403*      | [4671.853; 19528.952]    |
|                                                           | Elderly ( $\geq 75$ yo) | -32591.611       | [-96555.335; 32372.114]    | 13467.724*      | [6290.713; 20644.735]    |
| Female                                                    | Children ( $\geq 7$ yo) | -2189.798*       | [-3042.697; -1336.898]     | -68.912         | [-178.688; 40.864]       |
|                                                           | Adolescents (8-17 yo)   | -6117.776*       | [-11006.784; -1228.768]    | 353.541         | [-134.067; 841.148]      |
|                                                           | Adults (18-64 yo)       | -100364.591      | [-682009.174; 481279.993]  | 43320.425       | [-20399.669; 107040.519] |
|                                                           | Older adults (65-74 yo) | -188123.507*     | [-368422.98; -7824.035]    | 34517.764*      | [14349.058; 54686.469]   |
|                                                           | Elderly ( $\geq 75$ yo) | -296988.708*     | [-488433.705; -105543.71]  | 45314.417*      | [24366.492; 66262.343]   |
| Total                                                     |                         | -715338.834      | [-1830923.346; 400245.677] | 160018.013*     | [30606.329; 289429.696]  |

  

| NOSBC prescription - Pandemic interruption a month after |                         | Immediate impact |                           | Change in trend |                          |
|----------------------------------------------------------|-------------------------|------------------|---------------------------|-----------------|--------------------------|
|                                                          |                         | B                | 95% CI                    | B               | 95% CI                   |
| Male                                                     | Children ( $\geq 7$ yo) | -3582.643*       | [-5985.341; -1179.946]    | 68.401          | [-144.136; 280.938]      |
|                                                          | Adolescents (8-17 yo)   | -3533.364*       | [-6314.103; -752.625]     | 227.633         | [-108.943; 564.21]       |
|                                                          | Adults (18-64 yo)       | -230725.373      | [-506591.667; 45140.921]  | 36597.828*      | [3022.358; 70173.299]    |
|                                                          | Older adults (65-74 yo) | -63503.078       | [-128229.325; 1223.169]   | 17030.288*      | [8316.415; 25744.162]    |
|                                                          | Elderly ( $\geq 75$ yo) | -29603.396       | [-93744.958; 34538.167]   | 15954.116*      | [7463.368; 24444.863]    |
| Female                                                   | Children ( $\geq 7$ yo) | -3486.536*       | [-5150.787; -1822.284]    | 22.759          | [-106.401; 151.919]      |
|                                                          | Adolescents (8-17 yo)   | -6617.609*       | [-12402.634; -832.585]    | 643.942*        | [30.498; 1257.386]       |
|                                                          | Adults (18-64 yo)       | -206944.391      | [-812704.165; 398815.383] | 59228.487       | [-17372.601; 135829.576] |
|                                                          | Older adults (65-74 yo) | -213393.125*     | [-406415.557; -20370.692] | 49546.723*      | [24176.177; 74917.269]   |
|                                                          | Elderly ( $\geq 75$ yo) | -293121.926*     | [-497389.67; -88854.182]  | 64166.957*      | [37947.61; 90386.305]    |
| Total                                                    |                         | -1075542.186     | [-2233032.221; 81947.849] | 245259.373*     | [86158.069; 404360.678]  |
