# Supplementary material for: Prescription of anxiolytics, sedatives, hypnotics and antidepressants in outpatient, universal care during the COVID-19 pandemic in Portugal: a nationwide, interrupted time-series approach
Source: HighWire-hosted journal article supplement (doi:10.1136/jech-2021-216732), 2021-10-08
Supplement: jech-2021-216732supp005_data_supplement.pdf [file jech-2021-216732supp005_data_supplement.pdf]

Table S5 - Antidepressants prescription - sensitivity analysis

| No6A prescription - Pandemic interruption a month before |                         | Immediate impact   |                                   | Change in trend    |                               |
|----------------------------------------------------------|-------------------------|--------------------|-----------------------------------|--------------------|-------------------------------|
|                                                          |                         | B                  | 95% CI                            | B                  | 95% CI                        |
| Male                                                     | Children ( $\geq 7$ yo) | 11.84              | [-290.398; 314.077]               | -19.766            | [-52.063; 12.531]             |
|                                                          | Adolescents (8-17 yo)   | -8383.534*         | [-15799.137; -967.932]            | -2693.805*         | [-4341.132; -1046.478]        |
|                                                          | Adults (18-64 yo)       | -70108.64          | [-294624.012; 154406.732]         | -39515.517*        | [-72842.912; -6188.122]       |
|                                                          | Older adults (65-74 yo) | -40343.369         | [-127421.484; 46734.745]          | -17639.996*        | [-31249.379; -4030.613]       |
|                                                          | Elderly ( $\geq 75$ yo) | -35778.289         | [-137958.232; 66401.655]          | -16152.395*        | [-29839.242; -2465.549]       |
| Female                                                   | Children ( $\geq 7$ yo) | -0.048             | [-0.381; 0.285]                   | 0.002              | [-0.033; 0.037]               |
|                                                          | Adolescents (8-17 yo)   | -16934.889*        | [-29275.675; -4594.103]           | -950.262           | [-2506.647; 606.124]          |
|                                                          | Adults (18-64 yo)       | -366405.926        | [-1117793.322; 384981.469]        | -97339.735         | [-200500.737; 5821.268]       |
|                                                          | Older adults (65-74 yo) | -200925.497        | [-436641.308; 34790.315]          | -28514.549         | [-62770.33; 5741.232]         |
|                                                          | Elderly ( $\geq 75$ yo) | -229034.681        | [-479640.883; 21571.521]          | -29546.921         | [-65160.245; 6066.403]        |
| <b>Total</b>                                             |                         | <b>-950495.305</b> | <b>[-2512787.924; 611797.315]</b> | <b>-215594.322</b> | <b>[-441139.18; 9950.535]</b> |

  

| No6A prescription - Pandemic interruption a month after |                         | Immediate impact    |                                  | Change in trend    |                                  |
|---------------------------------------------------------|-------------------------|---------------------|----------------------------------|--------------------|----------------------------------|
|                                                         |                         | B                   | 95% CI                           | B                  | 95% CI                           |
| Male                                                    | Children ( $\geq 7$ yo) | -13.355             | [-329.846; 303.135]              | -18.823            | [-57.885; 20.24]                 |
|                                                         | Adolescents (8-17 yo)   | -10420.855*         | [-19495.993; -1345.718]          | -1765.912*         | [-3427.935; -103.889]            |
|                                                         | Adults (18-64 yo)       | -210625.491         | [-434277.912; 13026.931]         | -29337.098         | [-66132.694; 7458.497]           |
|                                                         | Older adults (65-74 yo) | -66599.141          | [-157092.79; 23894.507]          | -14885.601         | [-30515.424; 744.222]            |
|                                                         | Elderly ( $\geq 75$ yo) | -46232.134          | [-153362.243; 60897.975]         | -15682.729*        | [-31303.313; -62.146]            |
| Female                                                  | Children ( $\geq 7$ yo) | -0.135              | [-0.479; 0.208]                  | 0.011              | [-0.031; 0.053]                  |
|                                                         | Adolescents (8-17 yo)   | -18738.095*         | [-32287.087; -5189.104]          | -8.086             | [-1765.626; 1749.455]            |
|                                                         | Adults (18-64 yo)       | -739237.252         | [-1506672.927; 28198.422]        | -61435.122         | [-176465.546; 53595.302]         |
|                                                         | Older adults (65-74 yo) | -313947.947*        | [-554395.464; -73500.43]         | -14380.93          | [-51495.781; 22733.92]           |
|                                                         | Elderly ( $\geq 75$ yo) | -312666.551*        | [-577184.653; -48148.45]         | -14540.888         | [-54130.874; 25049.099]          |
| <b>Total</b>                                            |                         | <b>-1599440.946</b> | <b>[-3212138.275; 13256.383]</b> | <b>-142349.424</b> | <b>[-392991.579; 108292.731]</b> |
